# Supplementary material for: miR-27b targets MAIP1 to mediate lipid accumulation in cultured human and mouse hepatic cells
Source: PubMed Central journal article supplement (PMC10290684; doi:10.1038/s42003-023-05049-w), 2023-06-24
Supplement: 42003_2023_5049_MOESM2_ESM.pdf [file 42003_2023_5049_MOESM2_ESM.pdf]

**a**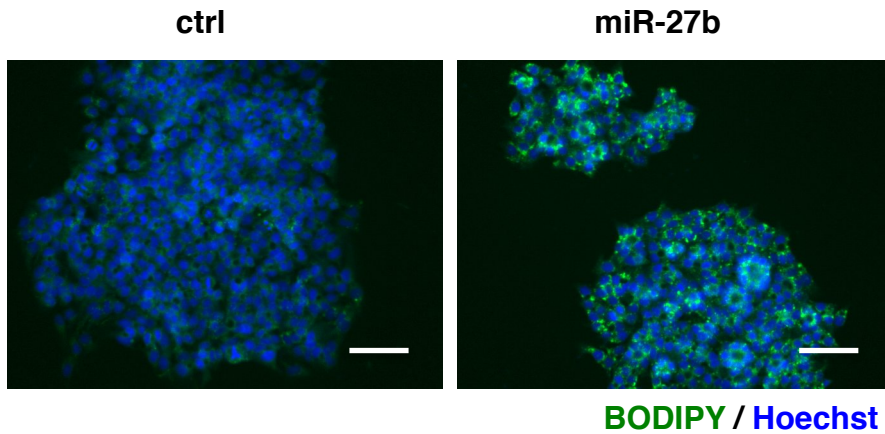**b**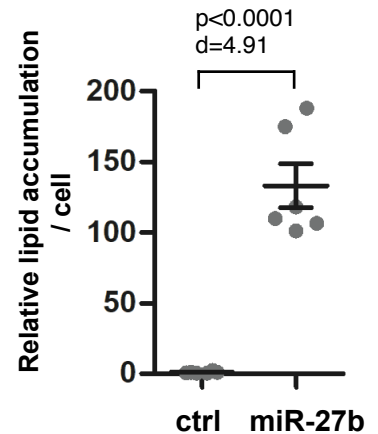**c**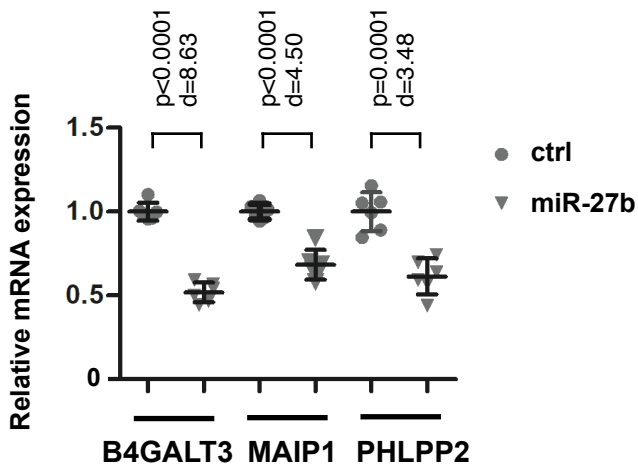

**Supplementary Figure 1 *miR-27b* induces lipid accumulation in HepG2 cells.**

(a) HepG2 cells were transfected with control miRNA (ctrl) and *miR-27b* mimics at 10 nM followed by co-staining with BODIPY493/503 for the lipid and Hoechst 33342 for the nuclei 4 days after transfection. Scale bars, 100  $\mu$ m. (b) The relative lipid amount was estimated based on the images in (a). n=3 biologically independent samples. Representative results from two independent experiments are presented as means  $\pm$  SD. p-values from unpaired-2-tailed Student's t-test and Cohen's d-values are shown. (c) The mRNA levels were examined 2 days after transfection by qRT-PCRs. n=3 biologically independent samples. Representative results from two independent experiments are presented as means  $\pm$  SD. p-values from unpaired-2-tailed Student's t-test and Cohen's d-values are shown. Gray circles, ctrl; gray triangles, *miR-27b* mimics.

**a**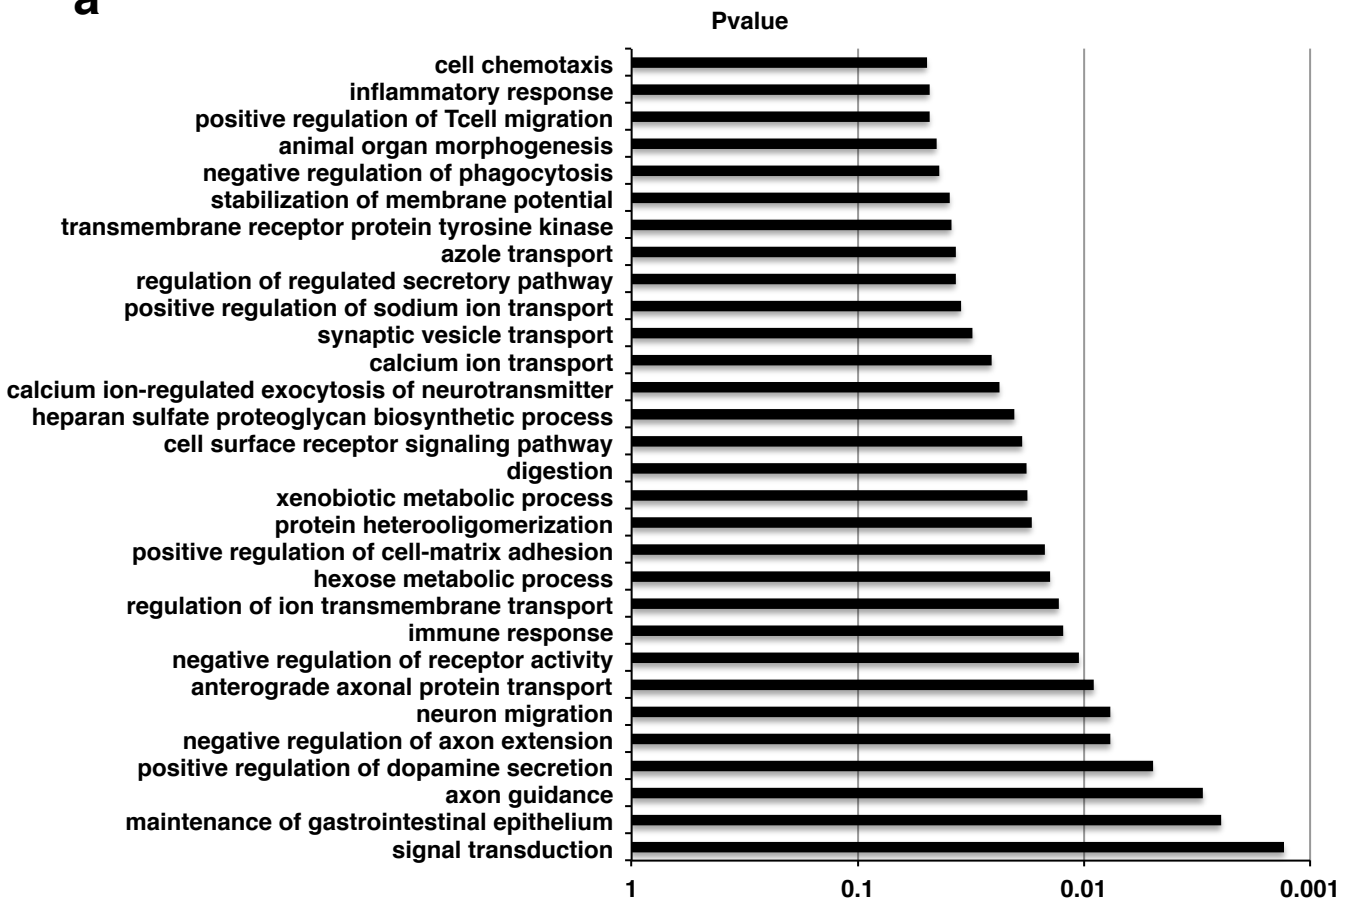**b**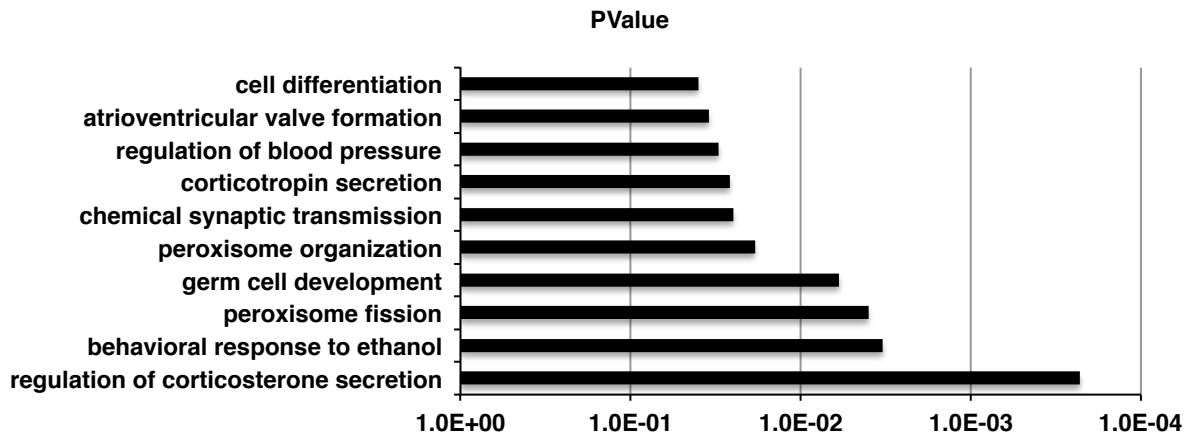

**Supplementary Figure 2 Functional annotation analysis of differentially expressing genes in *miR-27b*-transfected Huh-7 cells.** Genes with twofold up-(a) and down-(b) regulated expression in microarray analysis were analyzed for enrichment by DAVID (<https://david.ncifcrf.gov>). Pathways with significant enrichment ( $p < 0.5$ ) are shown.

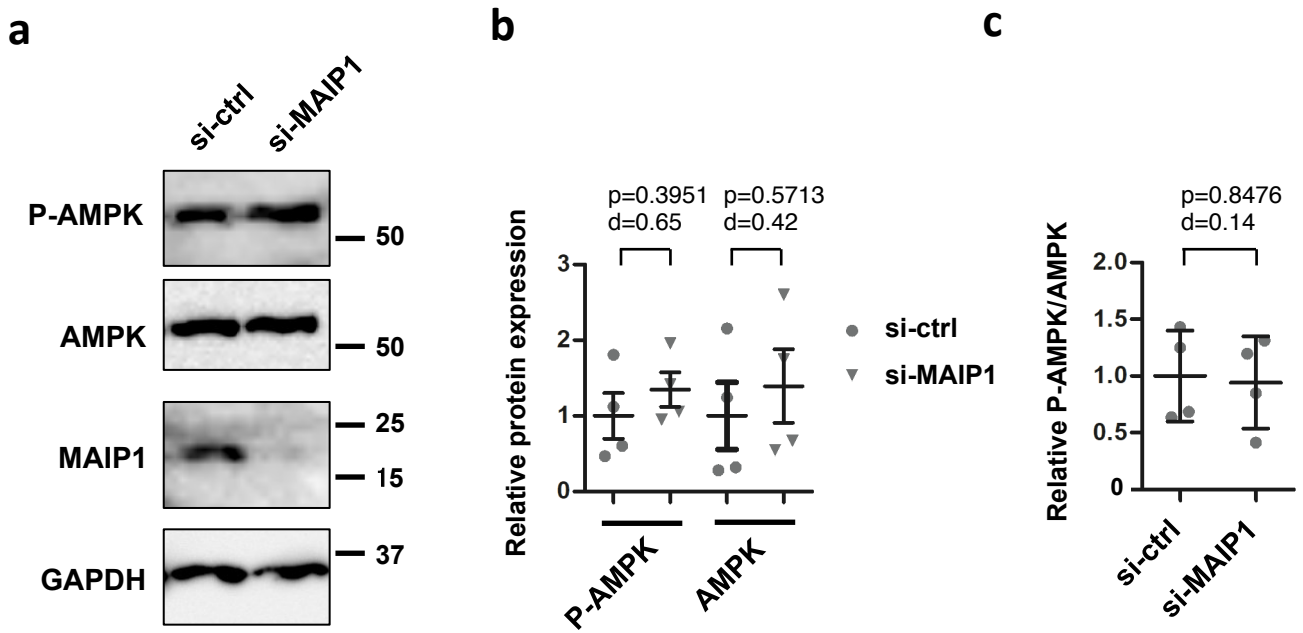

**Supplementary Figure 3 *MAIP1*-knockdown does not inactivate *AMPK*.**

(a) Huh-7 cells were transfected with control siRNA (si-ctrl) and si-*MAIP1* (10 nM) and protein expression was examined 3 days after transfection by Western blotting. Molecular weight markers are shown on the right. *GAPDH* is the internal control. (b and c) Protein expression was quantitated based on the images in (a), and relative AMPK protein expression (b) and the ratio of phosphorylated AMPK and total AMPK protein (c) are shown.  $n=3$  independent experiments. Results are presented as means  $\pm$  SE. p-values from unpaired-2-tailed Student's t-test and Cohen's d-values are shown. Gray circles, si-ctrl; gray triangles, si-*MAIP1* in (b).

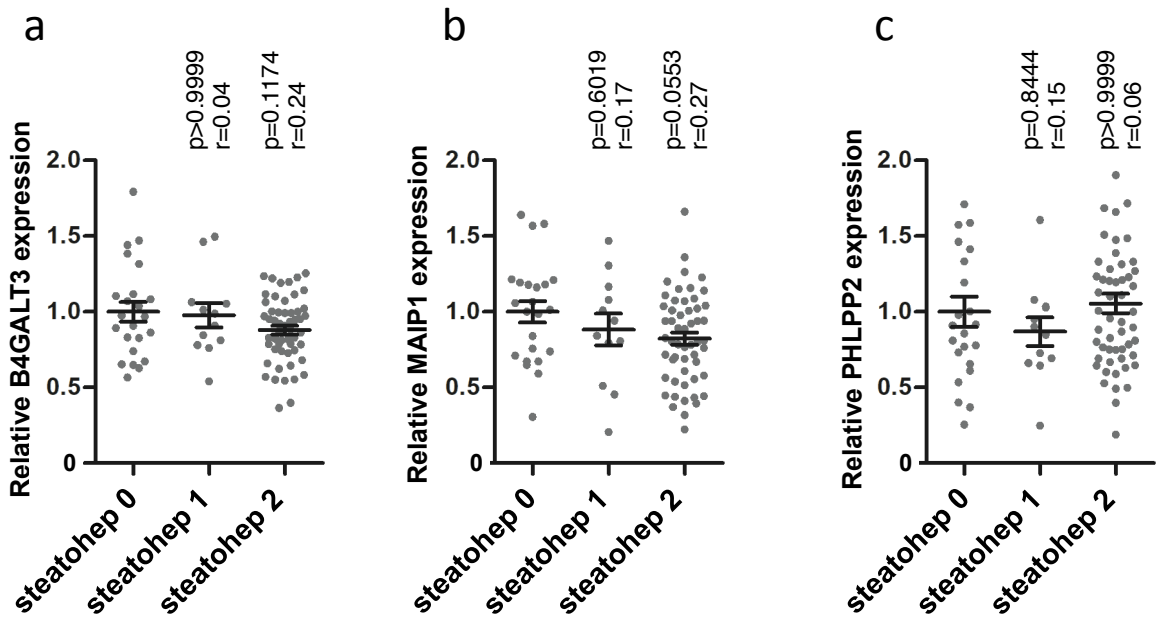

**Supplementary Figure 4      RNA expression of *B4GALT3*, *MAIP1* and *PHLPP2* in liver biopsies from NASH patients.**

Published RNA seq data (GE225740) was analyzed for *B4GALT3* (a), *MAIP1*(b) and *PHLPP2* (c). RNA count was normalized by  $\beta$ -actin (*ACTB*). Steatohepatitis was categorized as 0, 1, and 2, representing no steatohepatitis (n=23 independent biopsies), borderline steatohepatitis (n=12 independent biopsies) and definite steatohepatitis (n=54 independent biopsies), respectively. Relative levels to steatohepatitis 0 were presented. p-values from one way ANOVA followed by Bonferroni's post-hoc comparisons tests for steatohep 0 and Pearson's r-values are shown.

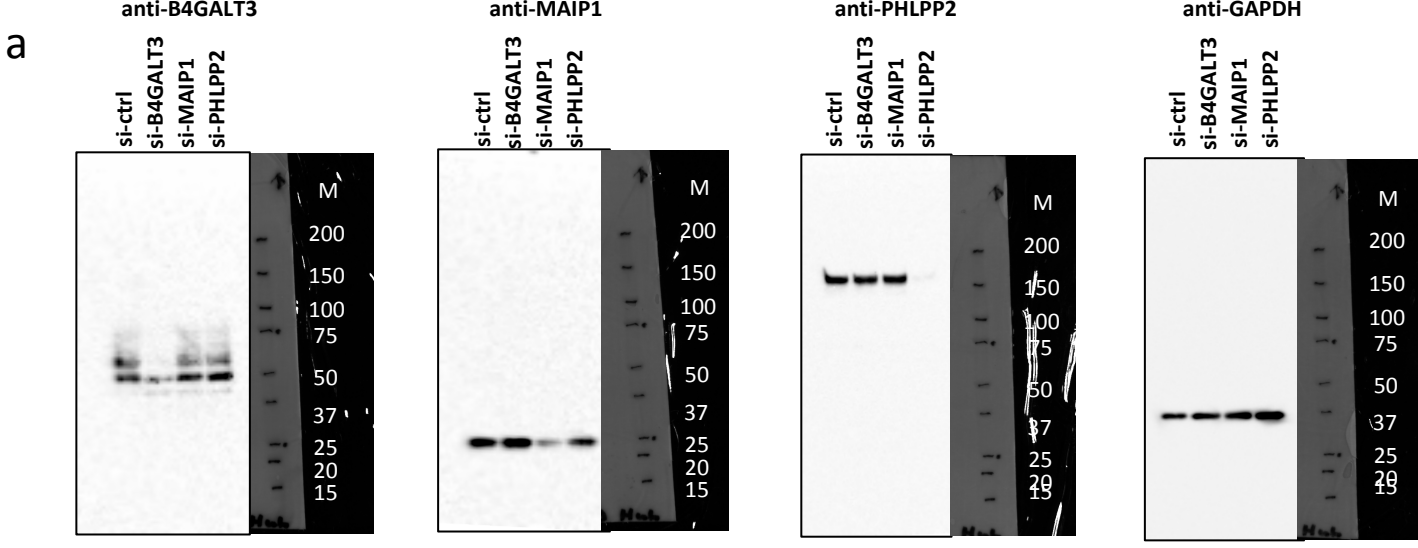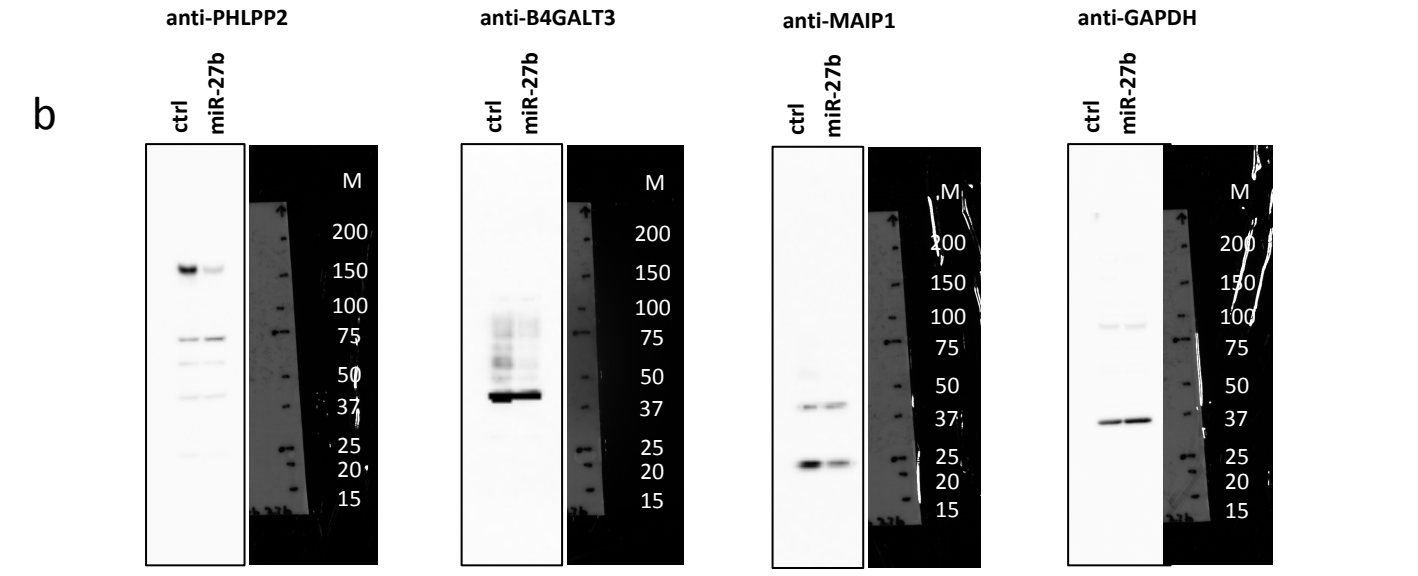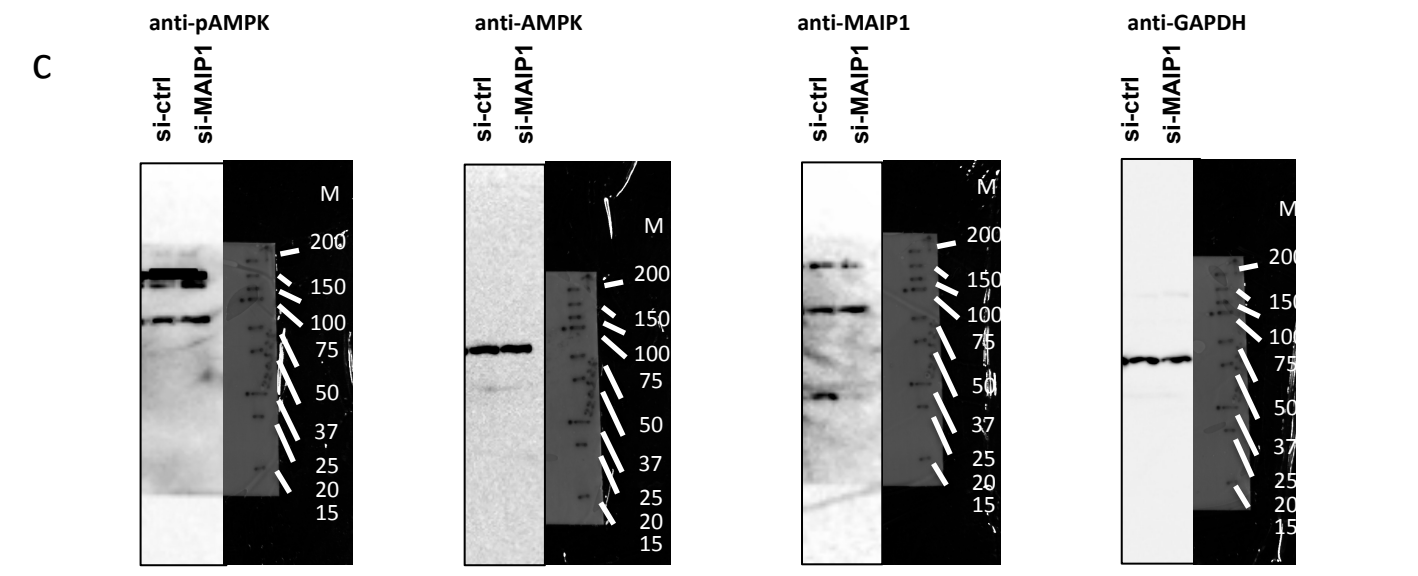

**Supplementary Figure 5** Scans and blots related to Figure 3a (a), Figure 4b (b) and Supplementary Figure 3a (c).

**Supplementary Table 1 Up and downregulated genes in the lipid and fatty acid-related functional annotation and KEGG pathways.**

| <b>Upregulated genes</b>          |                                                                                                                                            |
|-----------------------------------|--------------------------------------------------------------------------------------------------------------------------------------------|
| <b>Functional annotation</b>      | <b>Gene</b>                                                                                                                                |
| fatty acid biosynthesis           | ELOVL4, FADS2                                                                                                                              |
| fatty acid metabolism             | CYP2S1, ELOVL4, FADS2                                                                                                                      |
| lipid metabolism                  | CPS1, FABP3, FADS2, FAR2, ELOVL4, FUT1, GPAT2, CYP2S1, HSD3B1, HSD3B7, MBOAT1, PCYT1B, PIP5KL1, PLB1, PLCB2, PLCXD3, PSAPL1, TPTE2, UGT1AB |
| lipid biosynthesis                | FADS2, FAR2, ELOVL4, GPAT2, MBOAT1, PCYT1B                                                                                                 |
| lipid degradation                 | PLCB2, PLCXD3                                                                                                                              |
| Lipid transport                   | APOL5                                                                                                                                      |
| phospholipid biosynthesis         | GPAT2, MBOAT1, PCYT1B                                                                                                                      |
| phospholipid metabolism           | GPAT2, MBOAT1, PCYT1B, PLB1                                                                                                                |
| <b>KEGG pathway</b>               | <b>Gene</b>                                                                                                                                |
| lipid and atherosclerosis pathway | PYCARD, HSPA6, PLCB2, TLR2                                                                                                                 |
| sphingolipid metabolism           | PSAPL1                                                                                                                                     |
| non-alcoholic fatty liver disease | COX7B2                                                                                                                                     |
| fatty acid metabolism             | ELOVL4, FADS2                                                                                                                              |
| PPAR signaling pathway            | FABP3, FADS2                                                                                                                               |
| <b>Downregulated genes</b>        |                                                                                                                                            |
| <b>Functional annotation</b>      | <b>Gene</b>                                                                                                                                |
| lipid transport                   | STARD6                                                                                                                                     |
| lipid metabolism                  | ACADL, ACER1, B4GALT3, IDI2, PIK3C2G, SULT1E1                                                                                              |
| sphingolipid metabolism           | ACER1                                                                                                                                      |
| lipid biosynthesis                | IDI2                                                                                                                                       |
| fatty acid metabolism             | ACADL                                                                                                                                      |
| <b>KEGG pathway</b>               | <b>Gene</b>                                                                                                                                |
| lipid and atherosclerosis pathway | MIB2, CALM3, PPARG                                                                                                                         |
| sphingolipid metabolism           | ACER1                                                                                                                                      |
| non-alcoholic fatty liver disease | PPARG                                                                                                                                      |
| fatty acid metabolism             | ACADL                                                                                                                                      |
| PPAR signaling pathway            | ACADL, PPARG                                                                                                                               |

Supplementary Table 2 The *miR-27b*-target candidate genes selected from Supplementary Data set 2 and the genes, mouse orthologs of which were also predicted as *miR-27b* targets.

| Gene                 | Sequence Description                                                                                                                            | Accession #  |
|----------------------|-------------------------------------------------------------------------------------------------------------------------------------------------|--------------|
| ACADL                | Homo sapiens acyl-CoA dehydrogenase, long chain (ACADL), nuclear gene encoding mitochondrial protein, mRNA [NM_001608]                          | NM_001608    |
| AIF1L                | Homo sapiens allograft inflammatory factor 1-like (AIF1L), transcript variant 4, mRNA [NM_001185096]                                            | NM_001185096 |
| AKIRIN1              | Homo sapiens akirin 1 (AKIRIN1), transcript variant 1, mRNA [NM_024595]                                                                         | NM_024595    |
| AQP11                | Homo sapiens aquaporin 11 (AQP11), mRNA [NM_173039]                                                                                             | NM_173039    |
| ARF3                 | Homo sapiens ADP-ribosylation factor 3 (ARF3), mRNA [NM_001659]                                                                                 | NM_001659    |
| ASPH                 | Homo sapiens aspartate beta-hydroxylase (ASPH), transcript variant 3, mRNA [NM_032466]                                                          | NM_032466    |
| ATOX8                | Homo sapiens mRNA; cDNA DKFZp761E2117 (from clone DKFZp761E2117). [AL831857]                                                                    | AL831857     |
| B4GALT3              | Homo sapiens UDP-Gal/betaGlcNAc beta 1,4- galactosyltransferase, polypeptide 3 (B4GALT3), transcript variant 1, mRNA [NM_001199873]             | NM_001199873 |
| BRPF3                | Homo sapiens bromodomain and PHD finger containing 3 (BRPF3), mRNA [NM_015695]                                                                  | NM_015695    |
| C17orf103 (NATD1)    | Homo sapiens chromosome 17 open reading frame 103 (C17orf103), mRNA [NM_152914]                                                                 | NM_152914    |
| C2GD2                | Homo sapiens C2 calcium-dependent domain containing 2 (C2GD2), transcript variant 1, mRNA [NM_015500]                                           | NM_015500    |
| C2orf47 (MAIP1)      | Homo sapiens chromosome 2 open reading frame 47 (C2orf47), mRNA [NM_024520]                                                                     | NM_024520    |
| CAB39L               | Homo sapiens calcium binding protein 39-like (CAB39L), transcript variant 1, mRNA [NM_030925]                                                   | NM_030925    |
| GALM3                | Homo sapiens calmodulin 3 (phosphorylase kinase, delta) (GALM3), mRNA [NM_005184]                                                               | NM_005184    |
| CBX1                 | Homo sapiens chromobox homolog 1 (CBX1), transcript variant 1, mRNA [NM_006807]                                                                 | NM_006807    |
| CCNG1                | Homo sapiens cyclin G1 (CCNG1), transcript variant 1, mRNA [NM_004060]                                                                          | NM_004060    |
| CHIC1                | Homo sapiens cysteine-rich hydrophobic domain 1 (CHIC1), mRNA [NM_001039840]                                                                    | NM_001039840 |
| CKAP4                | Homo sapiens cytoskeleton-associated protein 4 (CKAP4), mRNA [NM_006825]                                                                        | NM_006825    |
| CNTLN                | Homo sapiens centlein, centrosomal protein (CNTLN), transcript variant 2, mRNA [NM_001114395]                                                   | NM_001114395 |
| CSDM1                | Homo sapiens CUB and Sushi multiple domains 1 (CSDM1), mRNA [NM_033225]                                                                         | NM_033225    |
| DCHS2                | Homo sapiens dachsous 2 (Drosophila) (DCHS2), transcript variant 2, mRNA [NM_001142552]                                                         | NM_001142552 |
| DCP2                 | Homo sapiens DCP2 decapping enzyme homolog (S. cerevisiae) (DCP2), transcript variant 1, mRNA [NM_152624]                                       | NM_152624    |
| DDAH1                | Homo sapiens dimethylarginine dimethylaminohydrolase 1 (DDAH1), transcript variant 1, mRNA [NM_012137]                                          | NM_012137    |
| DOCK8                | Homo sapiens dedicator of cytokinesis 8 (DOCK8), transcript variant 1, mRNA [NM_203447]                                                         | NM_203447    |
| DPYD                 | Homo sapiens dihydropyrimidine dehydrogenase (DPYD), transcript variant 1, mRNA [NM_000110]                                                     | NM_000110    |
| EFNA5                | Homo sapiens ephrin-A5 (EFNA5), mRNA [NM_001962]                                                                                                | NM_001962    |
| ELF5                 | Homo sapiens E74-like factor 5 (ets domain transcription factor) (ELF5), transcript variant 1, mRNA [NM_198381]                                 | NM_198381    |
| FAM104B (TMEM29)     | Homo sapiens family with sequence similarity 104, member B (FAM104B), transcript variant 1, mRNA [NM_138362]                                    | NM_138362    |
| FAM69A               | Homo sapiens family with sequence similarity 69, member A (FAM69A), transcript variant 5, mRNA [NM_001252273]                                   | NM_001252273 |
| GAPT                 | Homo sapiens GRB2-binding adaptor protein, transmembrane (GAPT), mRNA [NM_152687]                                                               | NM_152687    |
| GCH1                 | Homo sapiens GTP cyclohydrolase 1 (GCH1), transcript variant 1, mRNA [NM_000161]                                                                | NM_000161    |
| GDF6                 | Homo sapiens growth differentiation factor 6 (GDF6), mRNA [NM_001001557]                                                                        | NM_001001557 |
| GPR133               | Homo sapiens G protein-coupled receptor 133 (GPR133), mRNA [NM_198827]                                                                          | NM_198827    |
| GRM5                 | Homo sapiens glutamate receptor, metabotropic 5 (GRM5), transcript variant b, mRNA [NM_000842]                                                  | NM_000842    |
| GXYLT1               | Homo sapiens glucoside xylosyltransferase 1 (GXYLT1), transcript variant 1, mRNA [NM_173601]                                                    | NM_173601    |
| HDHD2                | Homo sapiens haloacid dehalogenase-like hydrolase domain containing 2 (HDHD2), mRNA [NM_032124]                                                 | NM_032124    |
| HNF4G                | Homo sapiens hepatocyte nuclear factor 4, gamma (HNF4G), mRNA [NM_004133]                                                                       | NM_004133    |
| HRH3                 | Homo sapiens histamine receptor H3 (HRH3), mRNA [NM_007232]                                                                                     | NM_007232    |
| KIAA0319L (AU040320) | Homo sapiens KIAA0319-like (KIAA0319L), mRNA [NM_024874]                                                                                        | NM_024874    |
| LAIR1                | Homo sapiens leukocyte-associated immunoglobulin-like receptor 1 (LAIR1), transcript variant a, mRNA [NM_002287]                                | NM_002287    |
| LIFR                 | Homo sapiens leukemia inhibitory factor receptor alpha (LIFR), transcript variant 2, mRNA [NM_002310]                                           | NM_002310    |
| LIN28B               | Homo sapiens lin-28 homolog B (C. elegans) (LIN28B), mRNA [NM_001004317]                                                                        |              |
| MARK1                | Homo sapiens MAP/microtubule affinity-regulating kinase 1 (MARK1), mRNA [NM_018650]                                                             | NM_018650    |
| MATN3                | Homo sapiens matrilin 3 (MATN3), mRNA [NM_002381]                                                                                               | NM_002381    |
| MBD2                 | Homo sapiens methyl-CpG binding domain protein 2 (MBD2), transcript variant 2, mRNA [NM_015832]                                                 | NM_015832    |
| MDH1B                | Homo sapiens malate dehydrogenase 1B, NAD (soluble) (MDH1B), mRNA [NM_001039845]                                                                | NM_001039845 |
| MFAP3L               | Homo sapiens microfibrillar-associated protein 3-like (MFAP3L), transcript variant 1, mRNA [NM_021647]                                          | NM_021647    |
| MREG                 | Homo sapiens melanoregulin (MREG), mRNA [NM_018000]                                                                                             | NM_018000    |
| MRO                  | Homo sapiens maestro (MRO), transcript variant 1, mRNA [NM_031939]                                                                              | NM_031939    |
| MSN                  | Homo sapiens moesin (MSN), mRNA [NM_002444]                                                                                                     | NM_002444    |
| NECAP1               | Homo sapiens NECAP endocytosis associated 1 (NECAP1), transcript variant 1, mRNA [NM_015509]                                                    | NM_015509    |
| NEK1                 | Homo sapiens NIMA (never in mitosis gene a)-related kinase 1 (NEK1), transcript variant 2, mRNA [NM_012224]                                     | NM_012224    |
| NEK6                 | Homo sapiens NIMA (never in mitosis gene a)-related kinase 6 (NEK6), transcript variant 2, mRNA [NM_014397]                                     | NM_014397    |
| NGFRAP1              | Homo sapiens nerve growth factor receptor (TNFRSF16) associated protein 1 (NGFRAP1), transcript variant 3, mRNA [NM_014380]                     | NM_014380    |
| NODAL                | Homo sapiens nodal homolog (mouse) (NODAL), mRNA [NM_018055]                                                                                    | NM_018055    |
| NPEPPS               | Homo sapiens aminopeptidase puromycin sensitive (NPEPPS), mRNA [NM_006310]                                                                      | NM_006310    |
| OLF1                 | Homo sapiens olfactomedin 1, mRNA (cDNA clone IMAGE:3351052), complete cds. [BC000189]                                                          | BC000189     |
| OLFML2A              | Homo sapiens olfactomedin-like 2A (OLFML2A), mRNA [NM_182487]                                                                                   | NM_182487    |
| PAQR9                | Homo sapiens progesterin and adipoQ receptor family member IX (PAQR9), mRNA [NM_198504]                                                         | NM_198504    |
| PEG10                | Homo sapiens paternally expressed 10 (PEG10), transcript variant 1, mRNA [NM_001040152]                                                         | NM_001040152 |
| PEX19                | Homo sapiens peroxisomal biogenesis factor 19 (PEX19), transcript variant 1, mRNA [NM_002857]                                                   | NM_002857    |
| PHLPP2               | Homo sapiens PH domain and leucine rich repeat protein phosphatase 2 (PHLPP2), mRNA [NM_015020]                                                 | NM_015020    |
| PPARG                | Homo sapiens peroxisome proliferator-activated receptor gamma (PPARG), transcript variant 3, mRNA [NM_138711]                                   | NM_138711    |
| PPIF                 | Homo sapiens peptidylprolyl isomerase F (PPIF), nuclear gene encoding mitochondrial protein, mRNA [NM_005729]                                   | NM_005729    |
| PP1L6                | Homo sapiens peptidylprolyl isomerase (cyclophilin)-like 6 (PP1L6), transcript variant 1, mRNA [NM_173672]                                      | NM_173672    |
| RCBTB1               | Homo sapiens regulator of chromosome condensation (RCC1) and BTB (POZ) domain containing protein 1 (RCBTB1), mRNA [NM_018191]                   | NM_018191    |
| RGPD5                | Homo sapiens RANBP2-like and GRIP domain containing 5 (RGPD5), transcript variant 1, mRNA [NM_005054]                                           | NM_005054    |
| RPIA                 | Homo sapiens ribose 5-phosphate isomerase A (RPIA), mRNA [NM_144563]                                                                            | NM_144563    |
| SERPINA11            | Homo sapiens serpin peptidase inhibitor, clade A (alpha-1 antitrypsin, antitrypsin), member 11 (SERPINA11), mRNA [NM_001080451]                 | NM_001080451 |
| SFTPA1               | Homo sapiens surfactant protein A1 (SFTPA1), transcript variant 1, mRNA [NM_005411]                                                             | NM_005411    |
| SFXN4                | Homo sapiens sideroflexin 4 (SFXN4), mRNA [NM_213649]                                                                                           | NM_213649    |
| SLC30A10             | Homo sapiens solute carrier family 30, member 10 (SLC30A10), mRNA [NM_018713]                                                                   | NM_018713    |
| SLC7A2               | Homo sapiens solute carrier family 7 (cationic amino acid transporter, y+ system), member 2 (SLC7A2), transcript variant 2, mRNA [NM_001008539] | NM_001008539 |
| TFPI                 | Homo sapiens tissue factor pathway inhibitor (lipoprotein-associated coagulation inhibitor) (TFPI), transcript variant 1, mRNA [NM_006287]      | NM_006287    |
| TMEM174              | Homo sapiens transmembrane protein 174 (TMEM174), mRNA [NM_153217]                                                                              | NM_153217    |
| TMEM194B             | Homo sapiens transmembrane protein 194B (TMEM194B), mRNA [NM_001142645]                                                                         | NM_001142645 |
| TMEM56               | Homo sapiens transmembrane protein 56 (TMEM56), transcript variant 1, mRNA [NM_001199679]                                                       | NM_001199679 |
| TMTC4                | Homo sapiens transmembrane and tetratricopeptide repeat containing 4 (TMTC4), transcript variant 1, mRNA [NM_032813]                            | NM_032813    |
| TSLP                 | Homo sapiens thymic stromal lymphopoietin (TSLP), transcript variant 1, mRNA [NM_033035]                                                        | NM_033035    |
| TSPYL5               | Homo sapiens TSPY-like 5 (TSPYL5), mRNA [NM_033512]                                                                                             | NM_033512    |
| UAP1                 | Homo sapiens UDP-N-acetylglucosamine pyrophosphorylase 1 (UAP1), mRNA [NM_003115]                                                               | NM_003115    |
| USP46                | Homo sapiens ubiquitin specific peptidase 46 (USP46), transcript variant 1, mRNA [NM_022832]                                                    | NM_022832    |
| VPS53                | vacuolar protein sorting 53 homolog (S. cerevisiae) [Source:HGNC Symbol;Acc:25608] [ENST00000541903]                                            | BC029560     |
| XIRP1                | Homo sapiens xin actin-binding repeat containing 1 (XIRP1), transcript variant 1, mRNA [NM_194293]                                              | NM_194293    |
| ZNF568               | Homo sapiens zinc finger protein 568 (ZNF568), transcript variant 5, mRNA [NM_001204838]                                                        | NM_001204838 |

85 genes predicted as *miR-27b* targets by Trgetscan Human 7.0 were selected from Supplementary Data set 2.

52 genes commonly predicted as *miR27b* target by Trgetscan Mouse 7.1 were highlighted in gray.

Supplementary Table 3 Validation of the target site conservation and gene expression for the 52 genes in Supplementary Table 2.

| Gene      | Suppressed below 0.6 in the three trials? | Target site-conservation? |
|-----------|-------------------------------------------|---------------------------|
| AKIRIN    | yes                                       | yes                       |
| AQP11     | no                                        | yes                       |
| ARF3      | nd                                        | no                        |
| ASPH      | nd                                        | no                        |
| ATO8      | nd                                        | no                        |
| B4GALT3   | yes                                       | yes                       |
| BRPF3     | no                                        | yes                       |
| C2CD2     | nd                                        | no                        |
| MAIP1     | yes                                       | yes                       |
| CAB39L    | no                                        | yes                       |
| CALM3     | yes                                       | yes                       |
| CCNG1     | yes                                       | yes                       |
| CHIC1     | nd                                        | no                        |
| CKAP4     | yes                                       | yes                       |
| DCP2      | yes                                       | yes                       |
| DDAH1     | yes                                       | yes                       |
| DPYD      | no                                        | yes                       |
| DOCK8     | nd                                        | no                        |
| EFNA5     | not detected                              | yes                       |
| FAM69A    | no                                        | yes                       |
| GPR133    | nd                                        | no                        |
| GRM5      | not detected                              | yes                       |
| GXYLT1    | nd                                        | no                        |
| HNF4G     | nd                                        | no                        |
| KIAA0319L | no                                        | yes                       |
| LAIR1     | nd                                        | no                        |
| LIFR      | no                                        | yes                       |
| MARK1     | no                                        | yes                       |
| MATN3     | no                                        | yes                       |
| MREG      | nd                                        | no                        |
| MSN       | not detected                              | yes                       |
| NECAP1    | yes                                       | yes                       |
| NEK1      | no                                        | yes                       |
| NEK6      | yes                                       | yes                       |
| NGFRAP1   | yes                                       | yes                       |
| NPEPPS    | no                                        | yes                       |
| OLFML2A   | nd                                        | no                        |
| PAQR9     | no                                        | yes                       |
| PHLPP2    | yes                                       | yes                       |
| PPARG     | nd                                        | yes                       |
| PPIF      | no                                        | yes                       |
| SERPINA11 | nd                                        | no                        |
| SFXN4     | nd                                        | no                        |
| SLC30A10  | nd                                        | no                        |
| SLC7A2    | no                                        | yes                       |
| TFPI      | nd                                        | no                        |
| TMEM174   | nd                                        | no                        |
| TMEM194B  | no                                        | yes                       |
| TMEM56    | nd                                        | no                        |
| TSPYL5    | not detected                              | yes                       |
| USP46     | no                                        | yes                       |
| VPS53     | nd                                        | no                        |

The 52 genes commonly predicted in Human and Mouse TargetScan were selected from the genes listed in Supplementary Table 2. Presence and absence of *miR-27b*-target sites conserved between *human* and *mouse* genomes are indicated as "yes" and "no" in the most right column, respectively. Genes with conserved sites were further analysed for expression in Figure 2b and those with downregulated expression below 0.6 compared to the control are indicated as "yes" in the middle column and ahownd in gray. The 4 genes were not detected and *PPARG* was not examined. nd, not done.



Supplementary Table 4 Oligonucleotides

| qPCR primers                       | Forward primer                                 | Reverse primer                                    |
|------------------------------------|------------------------------------------------|---------------------------------------------------|
| GAPDH                              | GGTGGTCTCCTCTGACTTCAAC                         | GTGGTCTTGAGGGCAATG                                |
| MARCH1                             | TGACAGGATTTCCCTTGCTC                           | CACCGTTAATCTAGTCACTGC                             |
| AKIRIN                             | AGCTCCAACCTTGCATCCTG                           | AGGGCACAGCTGTTTATTGG                              |
| AQP11                              | TGACCCAGTATCACGTCAGC                           | TGACCCGCTTTGAGCAAGTCG                             |
| ARF3                               | TCTGCCTAATGCTATGAACGC                          | ATGTACCAGTTACGGTGACGA                             |
| ASPH                               | GGGAGATTTTATTTCCACCTGGG                        | CCTTTGGCTTTATCCATCACTGC                           |
| B4GALT3                            | CGAGATCAGGGACCGACATTT                          | GATCGTTCTGGACAGTAGGGC                             |
| BRPF3                              | AGCTTCCGATGTTGGACTCA                           | AGGTGGCTTCTCAATGTAGCG                             |
| C2CD2                              | GGTTCTGATTACCAAGCCCAC                          | GGATTCCTGAGCAGTAGATGC                             |
| MAIP1                              | CTACAGCACGGAGGAGAAAGC                          | CGGAGAACTCTGTGATGCTG                              |
| CAB39L                             | GGCCTGCTAGTGACACTGATA                          | TACTCCACAGTAGGACTCCGA                             |
| CALM3                              | CAACACTCCCTCGGTACC                             | GGGCATGGAGAGAGACTCAG                              |
| CCNG                               | CCTTCTGTGTTGGCATTGTC                           | AAGCTCTTGCAGAAAGGTCA                              |
| CKAP4                              | TGGACAGTTTGGTTGCATACTC                         | CCTCAGGTCATCTAGTAAACCCCT                          |
| CORIN                              | AGGCCACTTTACGCAACTC                            | GCTGGTGGAGGTTAGTAGGG                              |
| DCP2                               | TAAAGCACAGGCAACCACTG                           | TCTGCCATTTCCCTCATAC                               |
| DDAH                               | ACGAGGTGCTGAAATCTTGG                           | CCAATTGCGATCAGGTTAGG                              |
| DPYD                               | GGCGGACATCGAGAGTATCCT                          | TTCTTGGCCGAAGTGAAACAC                             |
| FAM69A                             | ATGGGCCCTGCATGTAACAG                           | CTGATTGTTGGGCTTGGTG                               |
| GPR133                             | AAAGTCCCGGAGTGACTACTGA                         | TTGGTGAGATTCAGGCTGTC                              |
| HNF4G                              | GAGGTTCCAAGTGACAGTACG                          | CGAGGAGCAGAAAGCAACTC                              |
| KIAA0319L                          | GGAGATCCTGTAGCCACCTG                           | GACTCGGGAGGTAGGAGGAC                              |
| LIFR                               | CACCTGGTCTTGCAGCCTA                            | AGCCACTGCCACTGGGATGA                              |
| MARK1                              | GATGTGGCTCGAAAACCTTGG                          | TTTCTCTCTGGCCCTACAA                               |
| MATN3                              | TCTCCCGGATAATCGACACTC                          | CAAGGGTGTGATTCGACCCA                              |
| MBD2                               | CGAAAATCTGGGCTAAGTGC                           | GAGGATCGTTCCGAGTCTC                               |
| MREG                               | GGACCGTCTCATTGCACTTGA                          | GGGACTTGGAAACGGAAGGTA                             |
| NECAP1                             | GGATGCTCGTCTAAGTTGG                            | GAGGATGGTGGGGAAATAGT                              |
| NEK1                               | CAGTGATGTGGAGCCAACTG                           | AGTGCCATTTCTCGTTCAGG                              |
| NEK6                               | CAGGACTGTGTCAAGGAGATCG                         | ATGTTCACTCGTTGCTTTCG                              |
| NGFRAP1                            | GATGGTGGAGATGGAGATG                            | GCAGGATCAAGGCATAAGG                               |
| NPEPPS                             | GTGAGGCAGGGACTAATCAG                           | GTTCCCGTACCTGTTTGCAG                              |
| PAQR9                              | CAAGAGCCGTACCGACTGG                            | CCGATAATGTGAAAAGACCCCG                            |
| PHLPP2                             | TGGAACCTACTGAACGACCTC                          | ATCCAAACGATCCATGTGGCA                             |
| PLEKHJ1                            | CAGCTTCAATTGAGGACCCTGA                         | CCTCGGATATGCCGAACCTGTT                            |
| PPIF                               | TGAACCTGGGAACAAACCTC                           | GGAGCACAGGAGCTTACAGG                              |
| SFXN4                              | ACGCCACTGAAAGGGATCAAG                          | ACGGCTCCCGCCATTAGTA                               |
| SLC7A2                             | CCTTATGGCTTTACGGGAACG                          | CGAGGAGGTAGTACGGCATCA                             |
| TFPI                               | GATGGTCCGAATGGTTCCAG                           | GATTGCGGAGTCAGGGAGTTA                             |
| TMEM194B                           | TCCCTGGTCTGTTCTATGTC                           | GCTCTCAGTGGGTAGTGCAG                              |
| TMEM56                             | TCCCTATCTGCTTTCCTTGC                           | TACTGATGGTGTGGGTTCA                               |
| USP46                              | CACTATTGCGGACATCCTTCAG                         | CAGGTTCTGTTTCATGTTGCCA                            |
| VPS53                              | TCCCTCAGTCCATTTTCTG                            | GCCAGCTTTCAGACAAGTCC                              |
| mouse B4galt3                      | ATGATGTATCTGTCACTAGGGGG                        | GGACCCACTAAGAAGGGTGAT                             |
| mouse Maip1                        | ATTCTGGTCTCTGGCGTTG                            | CAGCCCTCGCTTCTTTACC                               |
| mouse Phlpp2                       | GGGGCAATGTTGTTTATTTG                           | CAGTTGAAGCAATCCACAGG                              |
| mouse Gapdh                        | AGGTGGTGTGAACGGATTG                            | TGTAGACCATGTAGTTGAGGTCA                           |
| <b>3'UTR cloning primers</b>       |                                                |                                                   |
| B4GALT3                            | CGACCTCGAGCACCTGGTTCCCTCCCAAGCCTTCCG           | GGTGGCGGCCGAGAAAATGCCAGGGAGGGGCTTC                |
| MAIP1                              | CGACCTCGAGTCAGCTTATGGACTTAGCAGTTG              | GGTGGCGGCCGCGGTGATAACAATCTGTGAAAATGC              |
| PHLPP2                             | CGACCTCGAGCAGTCTACCACCTGCCATT                  | GGTGGCGGCCGCTACCTCTCCTCCAGCATA                    |
| <b>Mutation primers</b>            |                                                |                                                   |
| B4GALT3 seed-1 mutation            | CTCCTGTAGGGCTTATGATTATAAATCCTTATGATCATG        | CATGACATCAAGGATTTATAATCATAAGCCCTACAGGAG           |
| B4GALT3 seed-2 mutation            | GAGTGATCTGGCTTCTCCTCGGACCTTTATAAATATTTATTC     | GAATAAATATTTATAAAGTCCGAGGAGAAGCCAGATCACTC         |
| MAIP1 seed-1 mutation              | GGACTTAGCAGTTGTTATAAAAACTAAGGAAGAAAAATTTGGG    | CCCAAAATTTTCTTCTTAGTTTATAAACAAGTCTAAAGTCC         |
| MAIP1 seed-2 mutation              | CACCTAATCTAAGTTATAAATTAATTTATATTTGAAACTACTCC   | GGAGTATTTCAAATAATAAAGTAATTTATAAATCTAGATTAAGTG     |
| PHLPP2 seed-1 mutation             | GAGCACTTTTCATTGATTATAAATTTTATTTTGAATCTGCACTCG  | CGAGTGCAGATTTAAAAATAAAGTTTATAATCAATGAAAAGTGCTC    |
| PHLPP2 seed-2 mutation             | CGAGGGTATAGGAAGGGCCCTATAAAGTTGATTTAATCTTTGG    | CCAAAAGTAAATCACTTTATAAAGGCCCTTCTATACCCTCG         |
| PHLPP2 seed-3 mutation             | GTTGATTAACCTTTGGATGTCAGATTATAAAGCTCTGAGAACTTGG | CCAAGTTTCTCAGGAGCTTTATAATCTGACATCCAAAAGTTAAATCAAC |
| <b>ORF cloning primers</b>         |                                                |                                                   |
| B4GALT3                            | GGTGGCGGCCGCGGTTTCATGATTAAAGTAGAC              | CGATCTAGAGGAGTGTGGATGGAGCCTTCTCTGCC               |
| MAIP1                              | ATTTGCGGCCGCGGTCATAAAATGGCGCTGG                | CGCGTCTAGAAGTCCATAAGCTGATTTTCC                    |
| <b>TK promoter cloning primers</b> | TGCAACCGGTCCTGGCCGTTGCTCGCGTTTG                | TCGAGCGGCCGCTAAGCGGGTCTGTCAGGGTCCG                |
