# Supplementary material for: miR-27b targets MAIP1 to mediate lipid accumulation in cultured human and mouse hepatic cells
Source: PubMed Central journal article supplement (PMC10290684; doi:10.1038/s42003-023-05049-w), 2023-06-24
Supplement: 42003_2023_5049_MOESM3_ESM.pdf [file 42003_2023_5049_MOESM3_ESM.pdf]

## Description of Additional Supplementary Files

**File name:** Supplementary Data 1

**Description:** Genes with fold change cut-offs of  $2 <$  (miR-27b vs control) in microarray analysis.

**File name:** Supplementary Data 2

**Description:** Genes with fold change cut-offs of  $< -2$  (miR-27b vs control) in microarray analysis.

**File name:** Supplementary Data 3

**Description:** The source data behind the graphs in the paper.
